# Supplementary material for: Occurrence of extended-spectrum β-lactamase (ESBL) and carbapenemase-producing Escherichia coli isolated from childhood diarrhoea in Yaoundé, Cameroon
Source: Research Square preprint supplement (doi:10.21203/rs.3.rs-4455487/v1), 2024-07-01
Supplement: Supplementary file 1 [file 7fe068d8da8048f0b1f3ea2f.docx]

Supplementary table 1: Characteristics of primers for PCR amplification

| *bla* genes | Primer name | Sequence (5'-3') | Amplicon size (bp) | Annealing  Temperatures | References |
| --- | --- | --- | --- | --- | --- |
| TEM | TEM-F  TEM-R | CATTTCCGTGTCGCCCTTATTC  CCAATGCTTAATCAGTGAGGC | 846bp | 56.9 | (Dimani et al., 2023) |
| CTX-M | CTX-MU-F  CTX-MU-R | CGATGTGCAGTACCAGTAA  TTAGTGACCAGAATCAGCGG | 586bp | 56.9 |
| SHV | SHV-F  SHV-R | AGCCGCTTGAGCAAATTAAAC  GTTGCCAGTGCTCGATCAGC | 786bp | 46.9 | (Zemtsa et al., 2022) |
| OXA-48 | OXA-48-F  OXA-48-R | GCTTGATCGCCCTCGATT  GATTTGCTCCGTGGCCGAAA | 283bp | 45 |
| *tet(*A) | *tet* (A)-F  *tet* (A)-R | GTGAAACCCAACATACCCC  GAAGGCAAGCAGGATGTAG | 719bp | 56.9 | (Rahman et al., 2020) |
| *tet*(B) | *tet* (B)-F  *tet* (B)-R | CCTTATCATGCCAGTGTTGC  ACTGCCGTTTTTTCGCC | 627bp | 58.8 | (Algammal et al., 2022) |
| *pap*A | *pap*A*-*F | ATGGCAGTGGTGTTTTGGTG | 720bp | 55 | (Zhang L et al., 2022) |
| *pap*A*-*R | CGTCCCACCATACGTGCTCTTC |
| *Fim*H | *Fim*H-F | TGCAGAACGGATAAGCCGTGG | 508bp | 55 | (Zhang L et al., 2022) |
| *Fim*H-R | GCAGTCACCTGCCCTCCGGTA |
